# Supplementary material for: Synthesis of 1,6-hexanediol from HMF over double-layered catalysts of Pd/SiO2 + Ir–ReOx/SiO2 in a fixed-bed reactor
Source: Royal Society of Chemistry journal article supplement (doi:10.1039/c5gc02228b), 2015-11-27
Supplement: c5gc02228b1.pdf [file c5gc02228b1.pdf]

## **Synthesis of 1,6-hexanediol from HMF over double-layered catalysts of Pd/SiO<sub>2</sub>+Ir-ReO<sub>x</sub>/SiO<sub>2</sub> in a fixed-bed reactor**

Bin Xiao,<sup>†</sup> Mingyuan Zheng,<sup>†\*</sup> Jifeng Pang,<sup>†</sup> Ruiyan Sun,<sup>†,‡</sup> Xinsheng Li,<sup>†,‡</sup> Hua Wang,<sup>†</sup> Xiaoli Pang,<sup>†</sup>  
Aiqin Wang,<sup>†</sup> Xiaodong Wang,<sup>†</sup> Tao Zhang<sup>†\*</sup>

<sup>†</sup>Dalian Institute of Chemical Physics, Chinese Academy of Sciences, State Key Laboratory of Catalysis, Zhongshan Road 457, Dalian 116023, China.

<sup>‡</sup>Graduate University of Chinese Academy of Sciences, Beijing 100049, China.

\*Corresponding author: Tel.: +86 411 84379738; fax: +86 411 84691570;

E-mail address: [myzheng@dicp.ac.cn](mailto:myzheng@dicp.ac.cn); [taozhang@dicp.ac.cn](mailto:taozhang@dicp.ac.cn).

## Experimental

Sub angstrom resolution HAADF STEM images were obtained on a JEOLJEM-ARM200F STEM/TEM, equipped with a CEOS probe corrector, with an attainable resolution of 0.08 nm. Before measurement, the sample was reduced at 573 K in flowing hydrogen for 2 h and passivated with 1% O<sub>2</sub>/N<sub>2</sub> at room temperature for 4 h. Afterward, the catalysts were ground to fine powders, ultrasonically dispersed in ethanol, and dripped on a holey C/Cu TEM grid.

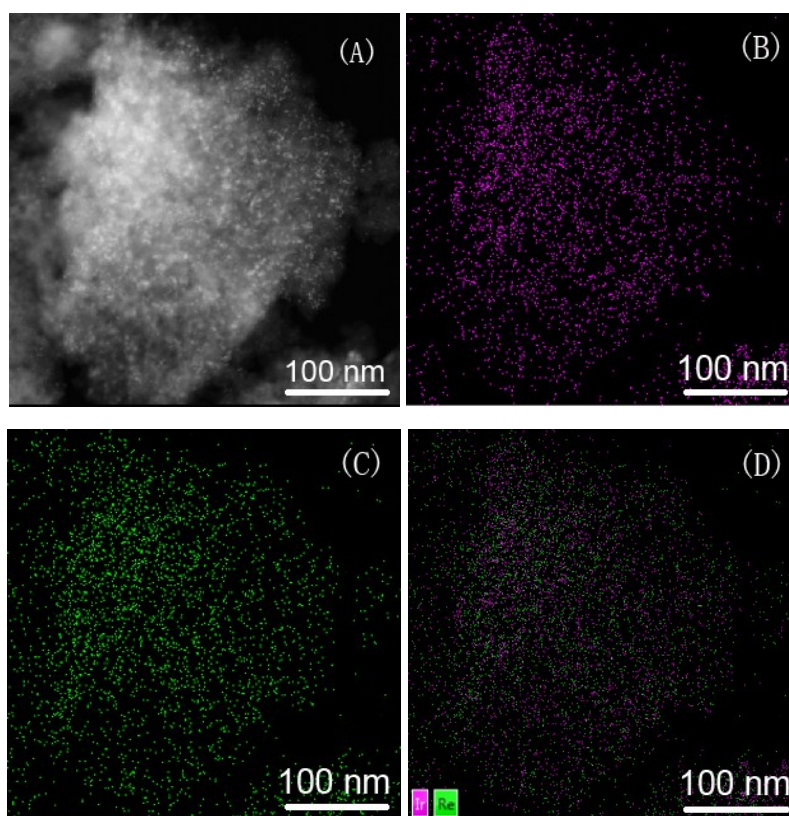

**Figure S1.** STEM and EDX images of Ir-ReO<sub>x</sub>/SiO<sub>2</sub>(5%-5%) catalyst. STEM image (A), EDX mappings of Ir (B), Re (C), and overlapped EDX mappings of Ir and Re (D).

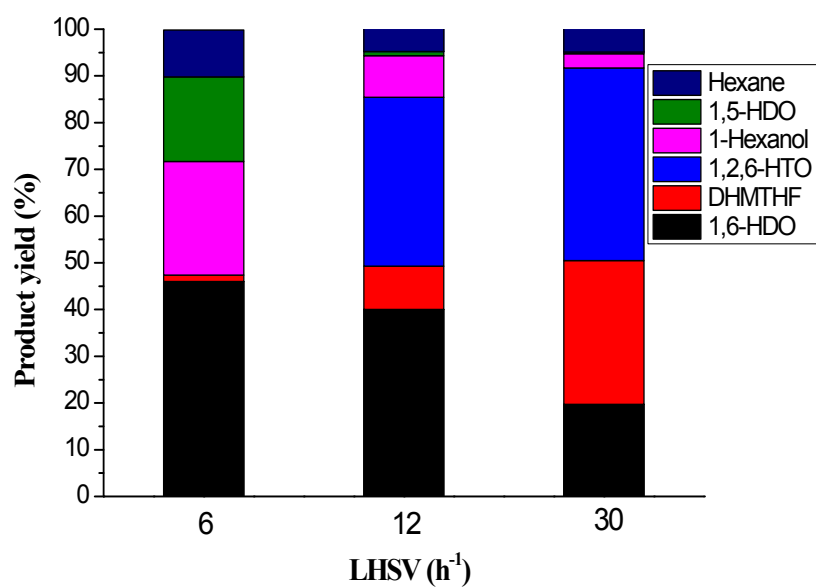

**Figure S2.** Results of HMF conversion over Pd/SiO<sub>2</sub>(0.6%)+Ir-ReO<sub>x</sub>/SiO<sub>2</sub>(5%-5%) catalysts under different LHSV. The carbon balance under three conditions is 100% ±5%. The yield of each product was normalized in the figure. (HMF conversions were 100% in all experiments; Reaction condition: 5 MPa H<sub>2</sub>, mixed solvents of water and THF at volume ratio of 2:3, 1 wt% HMF).
